# Supplementary material
Source: bioRxiv or medRxiv preprint supplement (https://www.biorxiv.org/content/biorxiv/early/2019/01/08/514125/DC1/embed/media-1.pdf)
Supplement: Supplementary file [file media-1.pdf]

## FIGURE S1

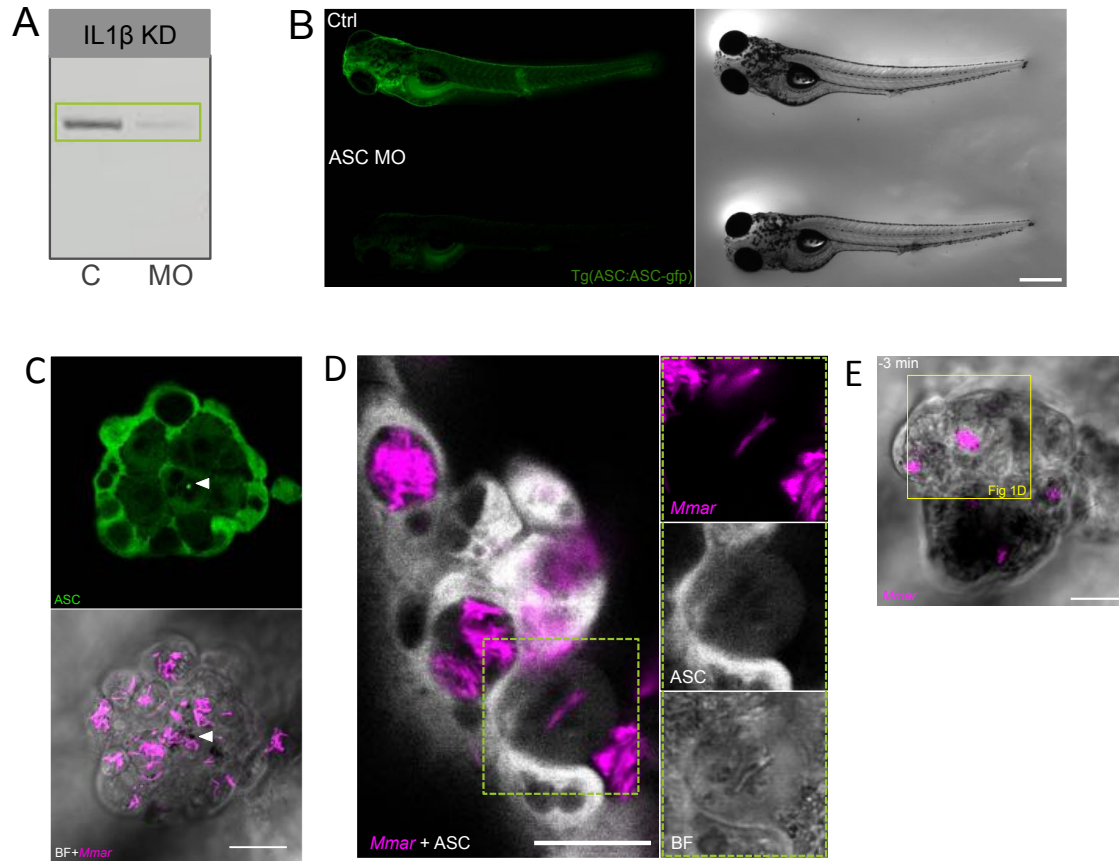

**Figure S1 (related to Figure 1). *Asc*-independent cell death is commonly visible in zebrafish granulomas.** (A) *il1 $\beta$*  KD efficiency was assessed by PCR on 4 dpf zebrafish DNA samples. (B) *asc* KD efficiency was assessed injecting *asc* MO into 1 cell-stage eggs from *tg(Asc:Asc-GFP)* zebrafish. Loss of Asc-GFP was assessed at 4 dpf. (C) Confocal images of a zebrafish granuloma at 3 dpi showing 1 Asc speck. (D) Confocal and BF images of Asc speck-independent cell death in zebrafish granuloma at 3dpi. (E) Confocal image of the granuloma shown in Figure 1D. Scale bars are 500 (B) and 20 (C, D, E)  $\mu$ m.

**FIGURE S2**

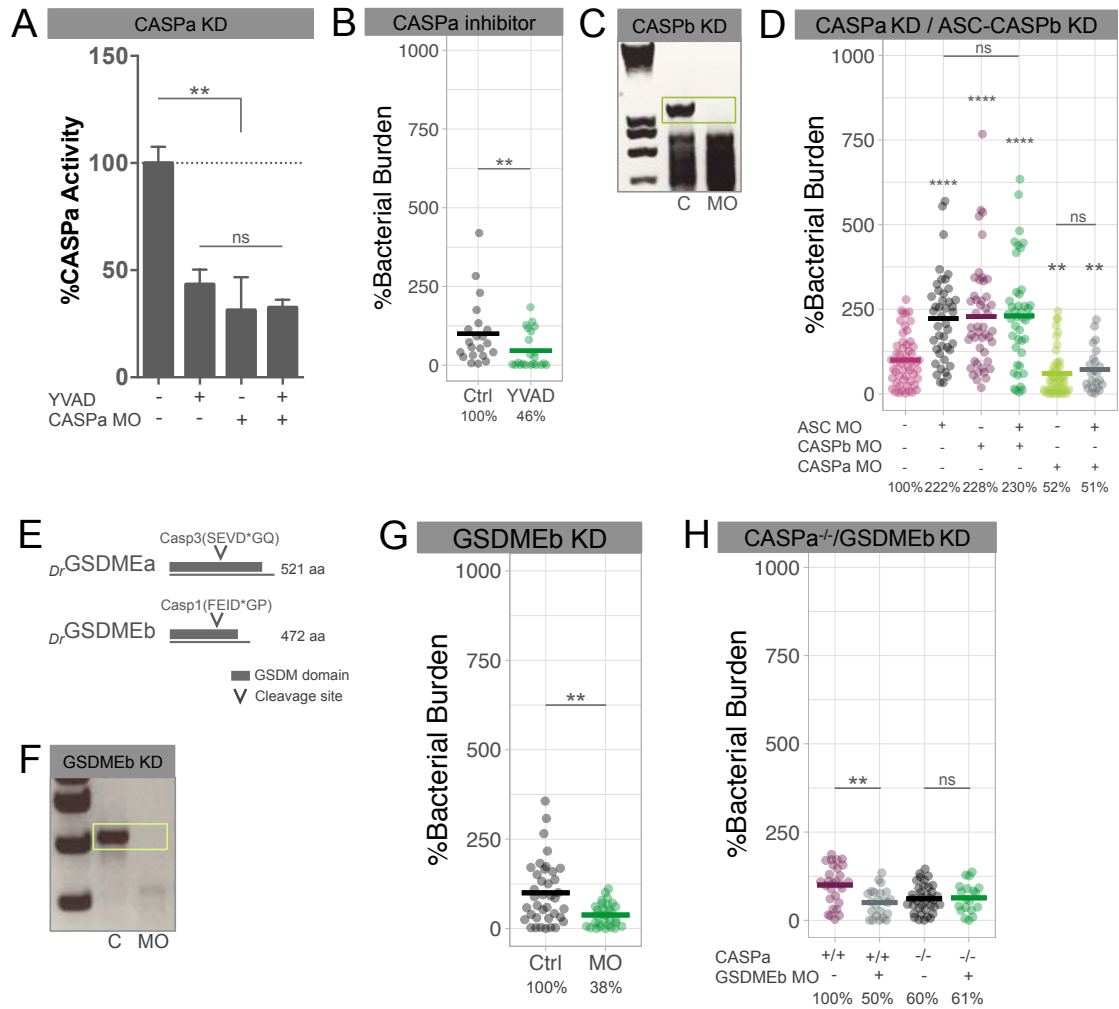

**Figure S2 (related to Figure 2). Disrupting Caspa/Gsdmeb axis increases host resistance to *Mmar* infection.** (A) Caspase-1 like activity in control and *caspa* KD zebrafish showing that YVAD specifically inhibits Caspa in this infection model. (B) Bacterial burden quantification after treatment with Caspa inhibitor (YVAD). (C) *caspb* KD efficiency was assessed by PCR on 4 dpf zebrafish DNA samples. (D) Bacterial burden quantification in *caspa+asc* KD and *asc+caspb* KD. (E) Schematic representing the 2 proteins with gasdermin domain in zebrafish (*Gsdmea* and *Gsdmeb*) and their caspase cleavage predicted sites. (F) *gsdmeb* KD efficiency was assessed by PCR on 4 dpf zebrafish DNA samples. (G) Bacterial burden data after transient *gsdmeb* KD in zebrafish larvae at 2 dpi (300 cfu). (H) Bacterial burden quantification in *caspa* mutants combined with *gsdmeb* KD. Mann-Whitney test (B, E) and Ordinary one-way ANOVA + Tukey's multiple comparisons test (A, D, H), \*\* $p < 0.01$ , \*\*\*\* $p < 0.0001$ .

**FIGURE S3**

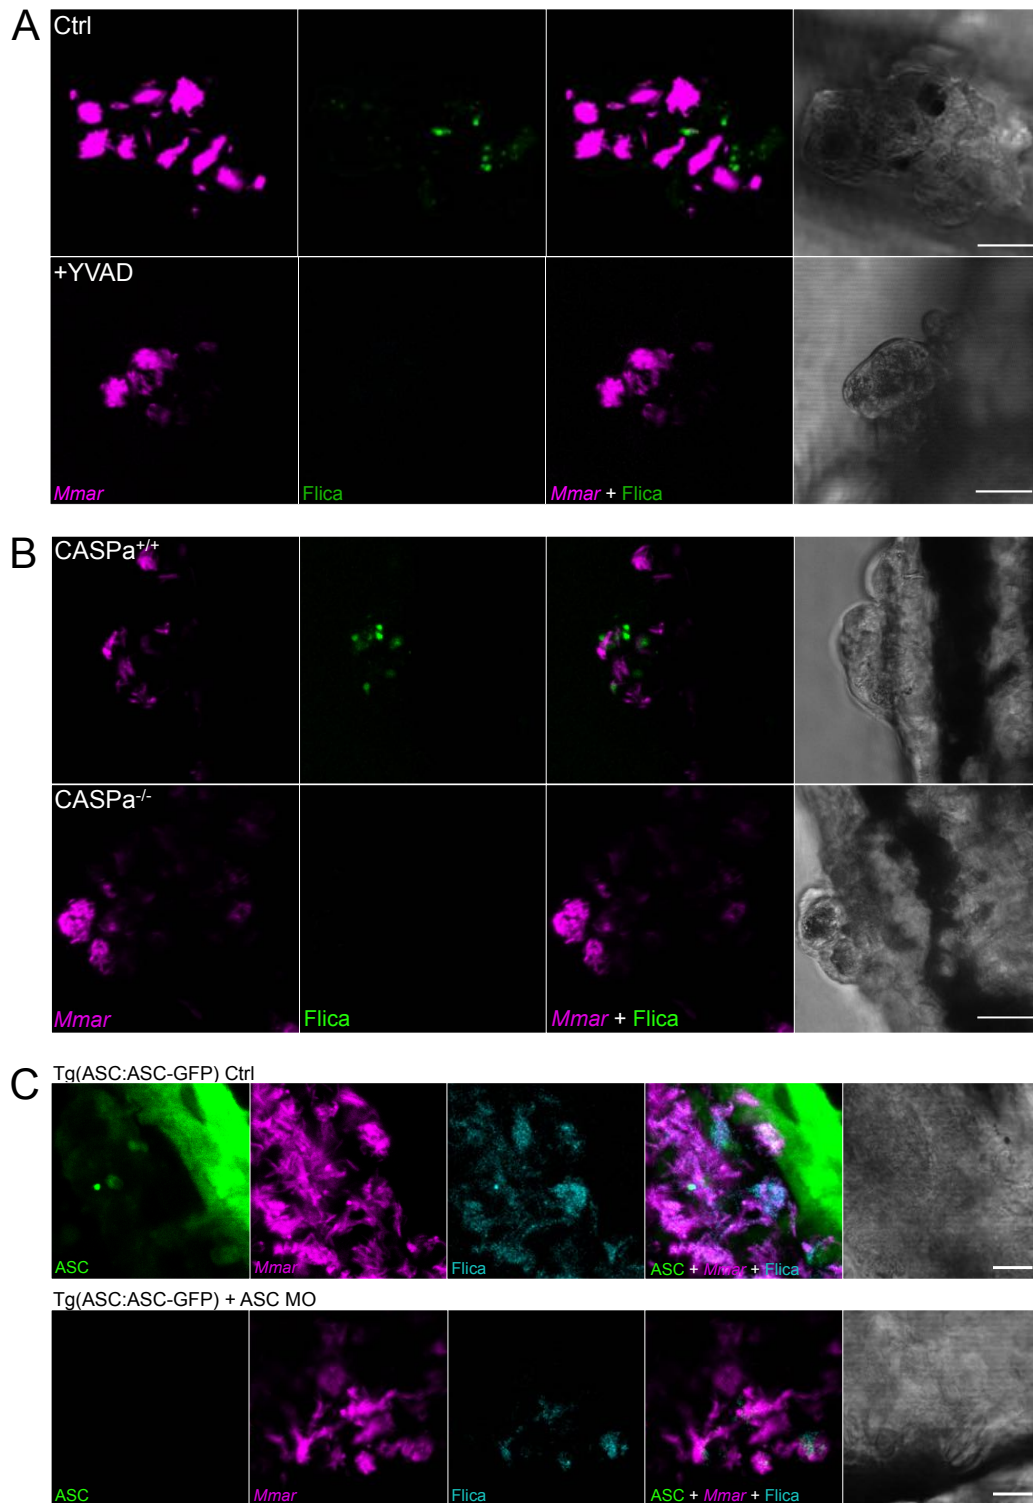

**Figure S3 (related to Figure 3). *In situ* Caspa activation is Asc independent and can be specifically detected in zebrafish granulomas.** (A) Confocal images showing the specificity of Flica staining after treatment with YVAD. (B) Confocal images showing the lack of Flica-positive signal in *casp*<sup>-/-</sup> zebrafish larvae. (C) Confocal images showing Caspa activation (Flica) in *asc* KD *Mmar*-infected zebrafish larvae. Images are representative of >3 granulomas per condition. Scale bars are 20 (A, B, C)  $\mu$ m.

**FIGURE S4**

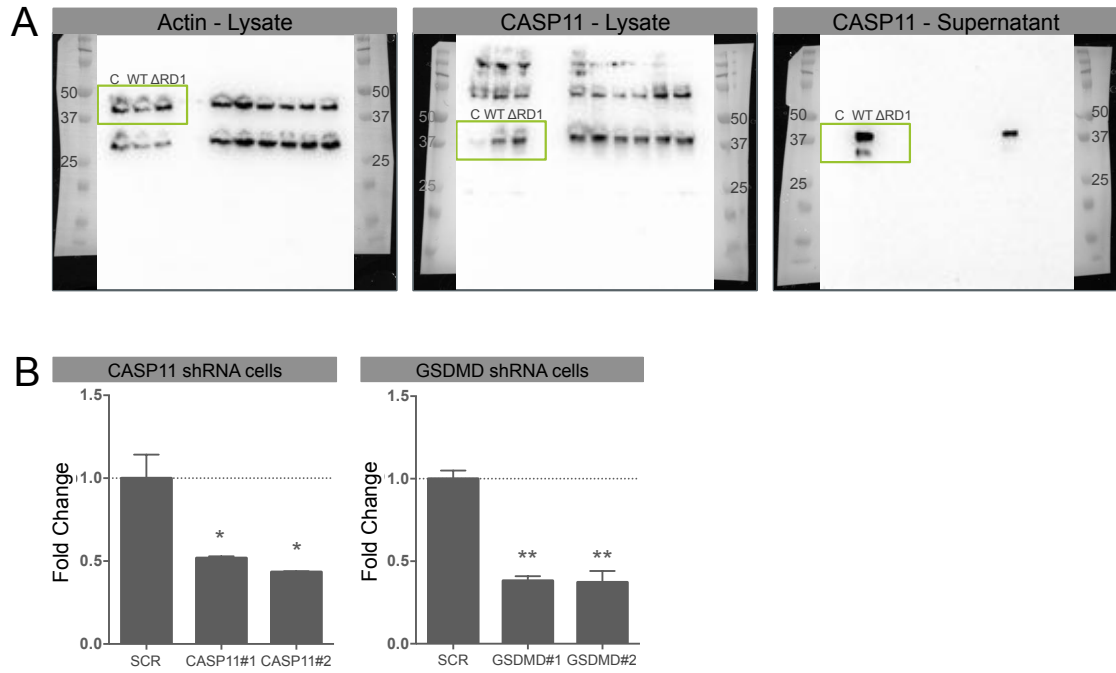

**Figure S4 (related to Figure 5). Silencing of CASP11 and GSDMD in Raw264.7 macrophages supports the requirement of these proteins for *Mmar*-induced pyroptosis. (A) Full blots from Figure 5A. (B) shRNA efficiency was assessed by qPCR on Raw264.7 DNA samples. Mann-Whitney test (B), \* $p < 0.05$ , \*\* $p < 0.01$ .**

**FIGURE S5**

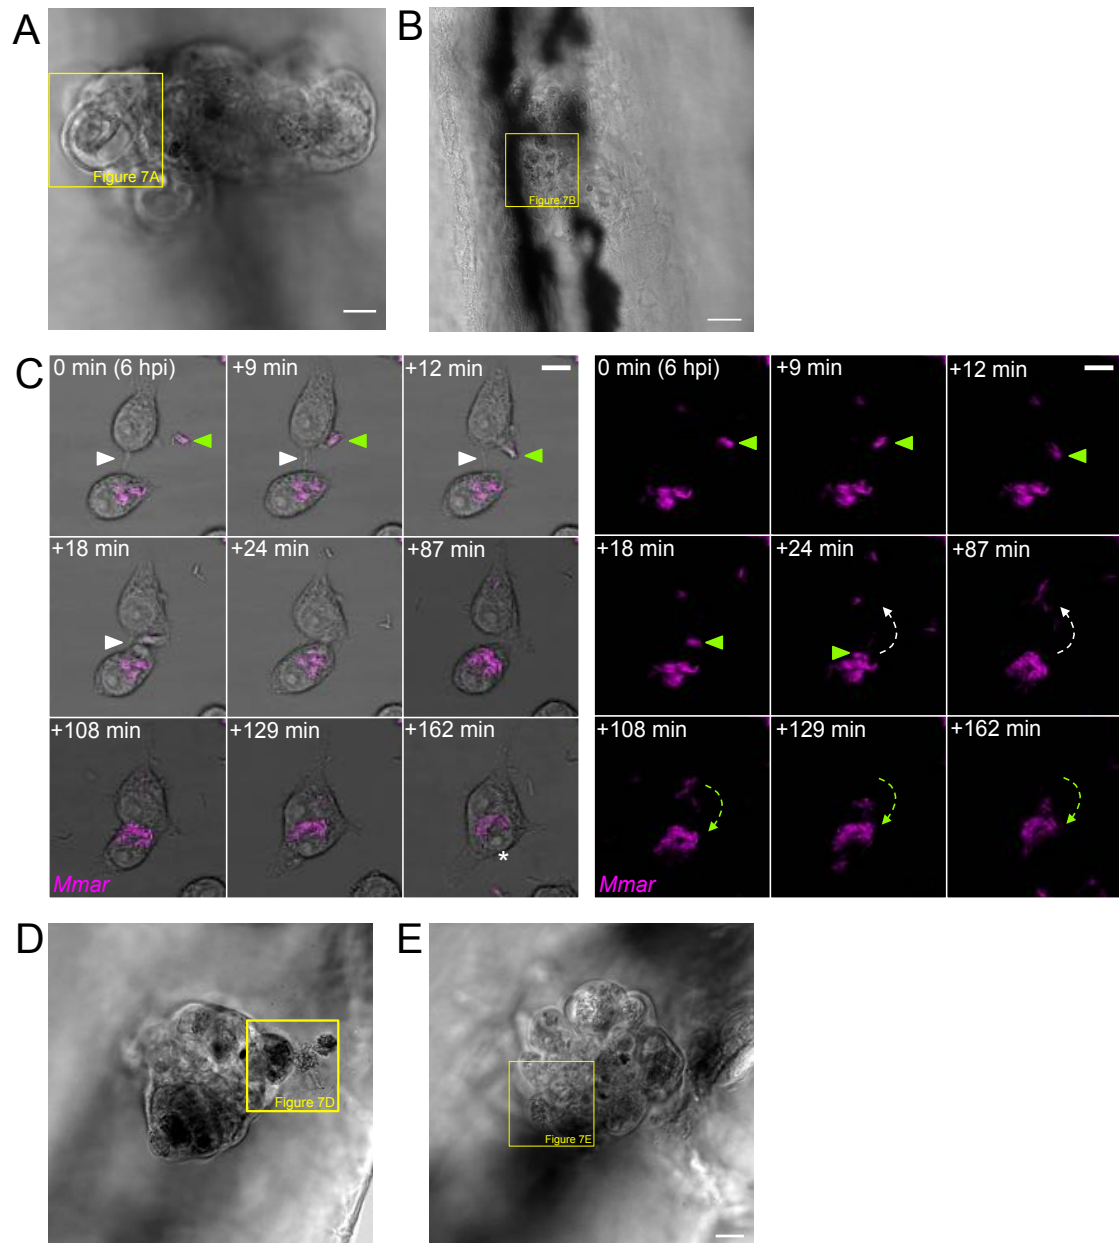

**Figure S5 (related to Figure 7). *Mmar* infection induces formation of cell-in-cell structures *in vivo* and *in vitro*.** (A) Zebrafish granuloma in Figure 7A. (B) Zebrafish granuloma in Figure 7B. (C) Confocal time-series showing cell-in-cell formation during *Mmar* infection (MOI=10) in Raw264.7 macrophages. Depicted cells are in contact (white arrow head). *Mmar* cluster (green arrow head) appears. Cell 1 (top cell) takes it up and transfers it inside cell 2 (bottom cell). Min 24, some bacteria from the cluster remain inside cell 1 and migrate towards the other cluster at the top of the cell (white arrow). Entosis starts min 108. Bacteria inside cell 1 migrate towards cell 2 while this cell is internalized by cell 1 (green arrow). Asterisk= cell 2 nucleus shrinkage. See also Movie 5. (D) Zebrafish granuloma in Figure 7D. (E) Zebrafish granuloma in Figure 7E. Scale bars are 10 (A, B, C, D, E)  $\mu\text{m}$ .

**FIGURE S6**

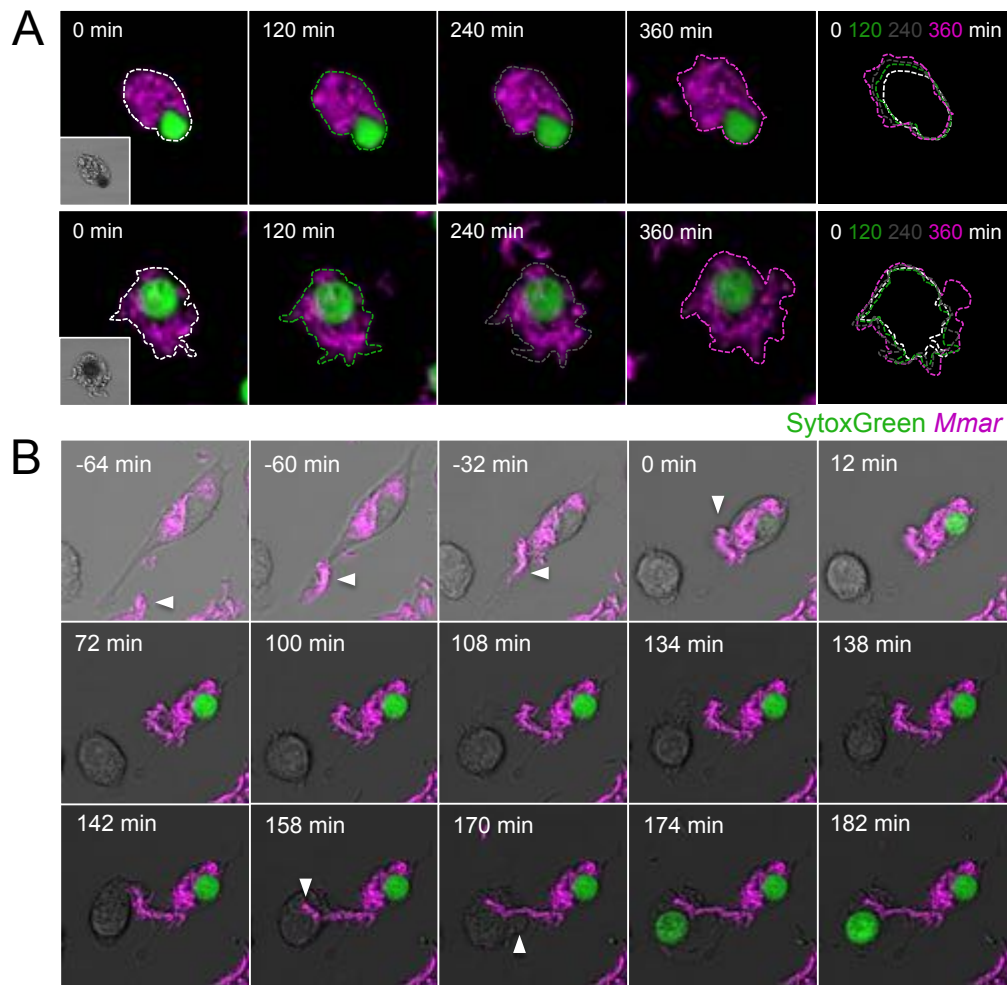

**Figure S6 (related to Figure 7). Pyroptosis of infected cells leads to *Mmar* extracellular growth and dissemination. (A) Extracellular growth of *Mmar* after Raw264.7 cell pyroptosis during 360 min after pyroptosis. (B) Attraction of new macrophages by pyroptotic cells. New cells phagocytose *Mmar* and die via pyroptosis (Movie 6). Scale bars are 10 (A, B)  $\mu\text{m}$ .**
